# Supplementary material for: Colorimetric ultrasensitive detection of DNA based on the intensity of gold nanoparticles with dark-field microscopy
Source: Royal Society of Chemistry journal article supplement (doi:10.1039/c8an00825f), 2018-01-01
Supplement: c8an00825f1.pdf [file c8an00825f1.pdf]

## **Colorimetric ultrasensitive detection of DNA based on intensity of gold nanoparticles with dark-field microscopy**

Jingjing Li,<sup>1</sup> Caiyun Kong,<sup>1</sup> Qingyun Liu,<sup>2</sup> and Zhengbo Chen<sup>1\*</sup>

<sup>1</sup> Department of Chemistry, Capital Normal University, Beijing, 100048, China

<sup>2</sup> College of Chemical and Environmental Engineering, Shandong University of Science and Technology, Qingdao, 266590, China

E-mail: [czb979216@sina.com](mailto:czb979216@sina.com)

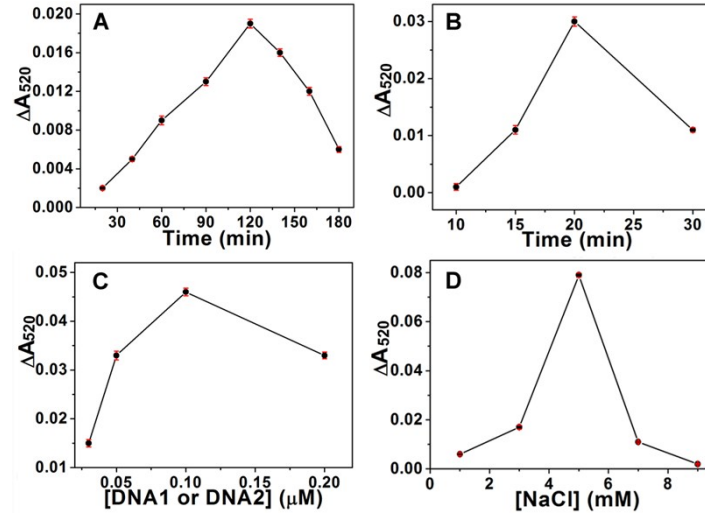

**Fig. S1** The effect of (A) the reaction time between hairpin DNA and target DNA, (B) incubation time of AuNPs, (C) DNA1/DNA2 concentration, and (D) NaCl concentration on the absorbance.

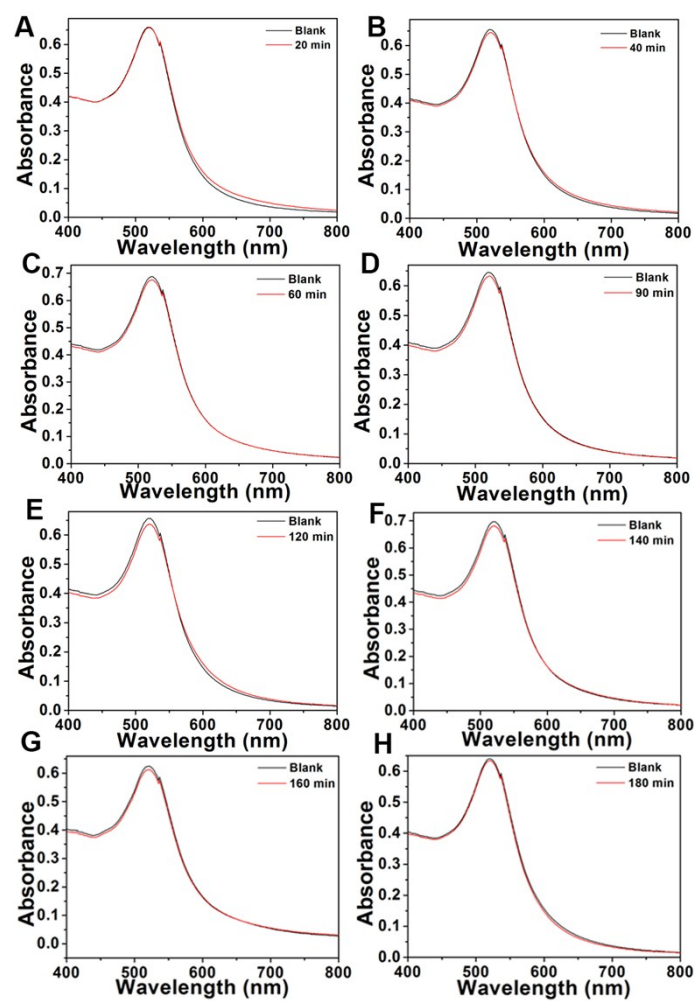

**Fig. S2** UV-vis absorption spectra of AuNPs after different reaction time between hairpin DNA and target DNA.

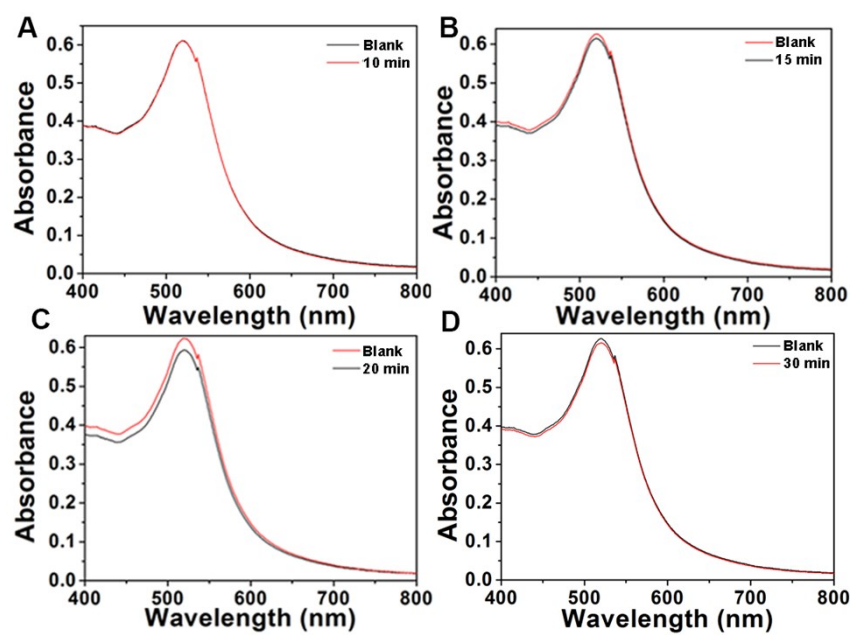

**Fig. S3** UV-vis absorption spectra of AuNPs after incubation of different time.

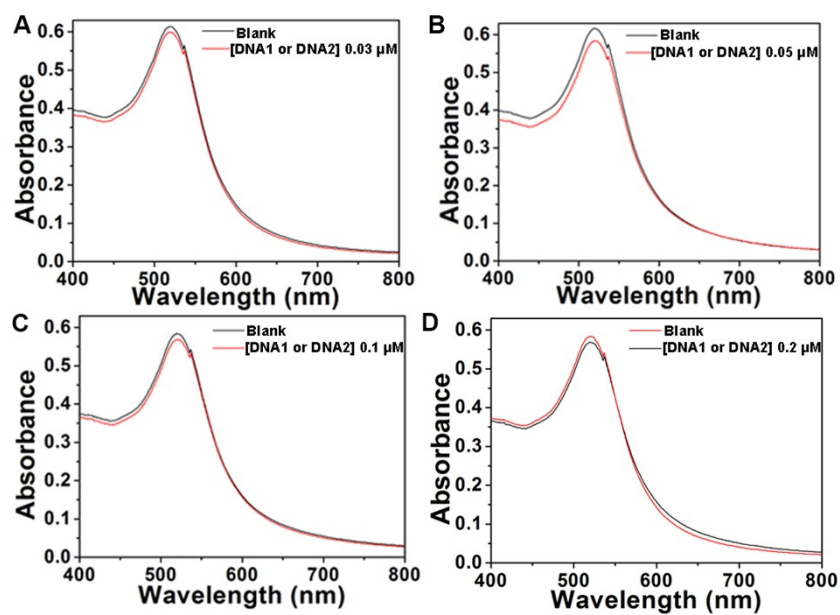

**Fig. S4** UV-vis absorption spectra of AuNPs in the presence of DNA1/DNA2 with different concentrations.

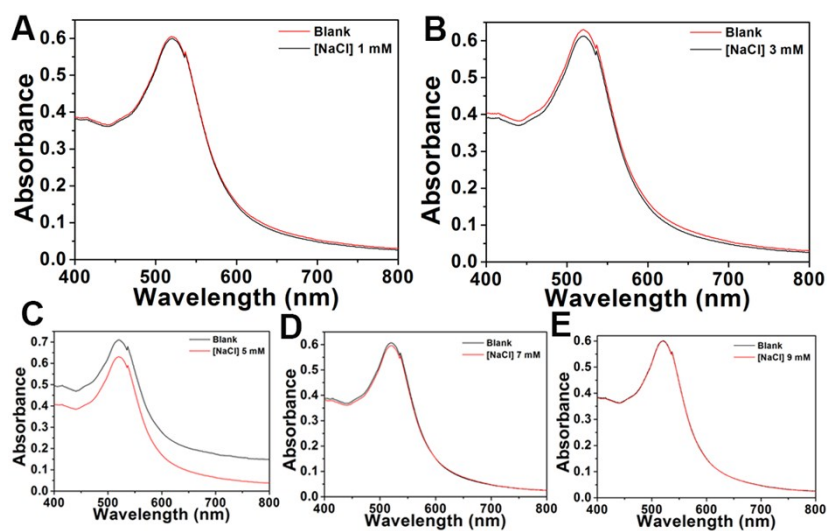

**Fig. S5** UV-vis absorption spectra of AuNPs in the presence of different concentrations of NaCl.
